# Supplementary material
Source: PubMed Central journal article supplement (PMC395923)
Supplement: pnas_101_16_6062__1.pdf [file pnas_101_16_6062__1.pdf]

Table 1. Human sample annotation

| Bought as tissue*          |                          |               |       |       |           |                         |
|----------------------------|--------------------------|---------------|-------|-------|-----------|-------------------------|
| Tissue                     | Atlas Sample Label       | Vendor        | Age   | Sex   | Ethnicity | Concomitant medications |
| Adipocyte                  | ADIPOCYTE                | Zen-Bio       | 39    | F     |           |                         |
| Adrenal Cortex             | AdrenalCortex            | Clinomics     | 43    | F     | Cau       | aspirin, Inderol        |
| Adrenal Cortex             | AdrenalCortex            |               | 50    | M     | Cau       | aspirin, Inderol        |
| Adrenal Cortex             | AdrenalCortex            |               | 56    | M     | Cau       | aspirin                 |
| Appendix                   | Appendix                 | Clinomics     | 60    | M     | Cau       | NA                      |
| Appendix                   | Appendix                 |               | 45    | M     | Cau       | NA                      |
| Appendix                   | Appendix                 |               | 58    | F     | Cau       | NA                      |
| Appendix                   | Appendix                 |               | 57    | F     | Cau       | Tylenol                 |
| atrioventricular node      | atrioventricularnode     | Clinomics     | 22    | M     | Cau       | None                    |
| atrioventricular node      | atrioventricularnode     |               | 61    | F     | Cau       | aspirin, Tylenol        |
| bronchial epithelial cells | bronchialepithelialcells | †             |       |       |           |                         |
| CardiacMyocytes            | CardiacMyocytes          | Clonetics Cat |       |       |           |                         |
| CerebellumPeduncles        | CerebellumPeduncles      | AMS Biotech.  | 41    | M     |           |                         |
| CerebellumPeduncles        | CerebellumPeduncles      |               | 24    | M     |           |                         |
| ciliary ganglion           | ciliaryganglion          | Clinomics     | 43    | M     | Cau       | Unk                     |
| ciliary ganglion           | ciliaryganglion          |               | 50    | M     | Cau       | aspirin, Tylenol        |
| ciliary ganglion           | ciliaryganglion          |               | 39    | F     | Cau       | None                    |
| Cingulate Cortex           | CingulateCortex          | Clinomics     | 28    | M     | Cau       | aspirin, Tylenol        |
| Cingulate Cortex           | CingulateCortex          |               | 22    | F     | Cau       | aspirin, Tylenol        |
| Cingulate Cortex           | CingulateCortex          |               | 52    | M     | Cau       | aspirin, Tylenol        |
| Cingulate Cortex           | CingulateCortex          |               | 54    | F     | Cau       | aspirin                 |
| DorsalRootGanglion         | DRG                      | Clinomics     | 52    | M     | Cau       | aspirin                 |
| DorsalRootGanglion         | DRG                      |               | 61    | F     | Cau       | aspirin                 |
| DorsalRootGanglion         | DRG                      |               | 58    | F     | Cau       | aspirin                 |
| fetalThyroid               | fetalThyroid             | ‡             | fetal | fetal |           |                         |
| globus pallidus            | globuspallidus           | Clinomics     | 66    | M     | Cau       | Unk                     |
| globus pallidus            | globuspallidus           |               | 52    | M     | Cau       | aspirin, Tylenol        |
| globus pallidus            | globuspallidus           |               | 51    | F     | Cau       | aspirin                 |
| globus pallidus            | globuspallidus           |               | 39    | F     | Cau       | None                    |
| medulla oblongata          | MedullaOblongata         | Clinomics     | 58    | M     | Cau       | None                    |
| medulla oblongata          | MedullaOblongata         |               | 28    | M     | Cau       | None                    |
| medulla oblongata          | MedullaOblongata         |               | 43    | F     | Cau       | None                    |
| OccipitalLobe              | OccipitalLobe            | AMS Biotech.  | 28    | M     |           |                         |
| OccipitalLobe              | OccipitalLobe            |               | 23    | M     |           |                         |
| Olfactory Bulb             | OlfactoryBulb            | Clinomics     | 43    | M     | Cau       | Unk                     |
| Olfactory Bulb             | OlfactoryBulb            |               | 58    | F     | Cau       | Unk                     |
| Olfactory Bulb             | OlfactoryBulb            |               | 61    | M     | Cau       | aspirin, Tylenol        |
| Olfactory Bulb             | OlfactoryBulb            |               | 66    | F     | Cau       | aspirin                 |
| ovary                      | Ovary                    | Clinomics     | 57    | F     | Cau       | aspirin, Tylenol        |
| ovary                      | Ovary                    |               | 53    | F     | Cau       | aspirin, Tylenol        |
| Pancreas, Beta cell islets | PancreaticIslets         | Clinomics     | 52    | F     | Cau       | aspirin                 |
| Pancreas, Beta cell islets | PancreaticIslets         |               | 41    | F     | Cau       | aspirin, Tylenol        |
| Pancreas, Beta cell islets | PancreaticIslets         |               | 61    | M     | Cau       | aspirin, Tylenol        |
| Pancreas, Beta cell islets | PancreaticIslets         |               | 28    | M     | Cau       | aspirin, Tylenol        |
| ParietalLobe               | ParietalLobe             | AMS Biotech.  | 22    | M     |           |                         |
| ParietalLobe               | ParietalLobe             |               | 28    | M     |           |                         |
| Pituitary                  | Pituitary                | Clinomics     | 25    | M     | Cau       | NA                      |
| Pituitary                  | Pituitary                |               | 41    | F     | Cau       | NA                      |
| pons                       | Pons                     | Clinomics     | 58    | M     | Cau       | aspirin, Tylenol        |
| pons                       | Pons                     |               | 61    | M     | Cau       | Unk                     |
| pons                       | Pons                     |               | 66    | F     | Cau       | aspirin, Tylenol        |
| pons                       | Pons                     |               | 52    | F     | Cau       | aspirin, Tylenol        |
| PrefrontalCortex           | PrefrontalCortex         | Mt. Sinai     | 96    | F     |           |                         |
| PrefrontalCortex           | PrefrontalCortex         |               | 90    | F     |           |                         |
| PrefrontalCortex           | PrefrontalCortex         |               | 74    | F     |           |                         |
| PrefrontalCortex           | PrefrontalCortex         |               | 64    | F     |           |                         |
| salivary gland             | salivarygland            | Clinomics     | 21    | M     | Cau       | aspirin, Inderol        |
| salivary gland             | salivarygland            |               | 55    | M     | Cau       | aspirin, Inderol        |
| salivary gland             | salivarygland            |               | 29    | F     | Cau       | aspirin                 |
| salivary gland             | salivarygland            |               | 51    | F     | Cau       | aspirin                 |
| Skeletal Muscule (psoas)   | SkeletalMuscle           | Clinomics     | 41    | F     | Cau       | Tylenol                 |
| Skeletal Muscule (psoas)   | SkeletalMuscle           |               | 58    | F     | Cau       | Tylenol                 |
| Skeletal Muscule (psoas)   | SkeletalMuscle           |               | 62    | M     | Cau       | Tylenol                 |
| Skeletal Muscule (psoas)   | SkeletalMuscle           |               | 60    | M     | Cau       | NA                      |
| Skin                       | skin                     | Clinomics     | 47    | F     | Cau       | NA                      |
| Skin                       | skin                     |               | 50    | F     | Cau       | NA                      |
| Skin                       | skin                     |               | 56    | M     | Cau       | Ativan                  |
| SmoothMuscle               | SmoothMuscle             | Clonetics     | 62    | M     | cau       | none                    |
| subthalamic nucleus        | subthalamicnucleus       | Clinomics     | 44    | M     | Cau       | Unk                     |
| subthalamic nucleus        | subthalamicnucleus       |               | 43    | M     | Cau       | Unk                     |
| subthalamic nucleus        | subthalamicnucleus       |               | 58    | F     | Cau       | aspirin                 |
| subthalamic nucleus        | subthalamicnucleus       |               | 61    | F     | Cau       | aspirin                 |
| superior cervical ganglion | SuperiorCervicalGanglion | Clinomics     | 58    | M     | Cau       | aspirin, Tylenol        |
| superior cervical ganglion | SuperiorCervicalGanglion |               | 28    | M     | Cau       | Unk                     |
| superior cervical ganglion | SuperiorCervicalGanglion |               | 22    | F     | Cau       | None                    |
| temporal lobe              | TemporalLobe             | Clinomics     | 51    | M     | Cau       | None                    |
| temporal lobe              | TemporalLobe             |               | 28    | M     | Cau       | None                    |
| temporal lobe              | TemporalLobe             |               | 44    | F     | Cau       | None                    |
| temporal lobe              | TemporalLobe             |               | 43    | F     | Cau       | None                    |

|                             |                          |           |    |   |                  |                  |
|-----------------------------|--------------------------|-----------|----|---|------------------|------------------|
| Testi - Germ Cell           | TestisGermCell           | Clinomics | 51 | M | Cau              | aspirin          |
| Testi - Germ Cell           | TestisGermCell           |           | 52 | M | Cau              | aspirin          |
| Testi - Germ Cell           | TestisGermCell           |           | 50 | M | Cau              | aspirin          |
| Testi - Interstitial        | TestisInterstitial       | Clinomics | 54 | M | Cau              | aspirin          |
| Testi - Interstitial        | TestisInterstitial       |           | 69 | M | Cau              | Tylenol          |
| Testi - Interstitial        | TestisInterstitial       |           | 42 | M | Cau              | Vioxx            |
| Testi - Interstitial        | TestisInterstitial       |           | 44 | M | Cau              | NA               |
| Testi - Leydig Cell         | TestisLeydigCell         | Clinomics | 53 | M | Cau              | NA               |
| Testi - Leydig Cell         | TestisLeydigCell         |           | 78 | M | Cau              | Ativan           |
| Testi - Leydig Cell         | TestisLeydigCell         |           | 43 | M | Cau              | xanax            |
| Testi - Leydig Cell         | TestisLeydigCell         |           | 49 | M | Cau              | Tylenol          |
| Testi - Seminiferous Tubule | TestisSeminiferousTubule | Clinomics | 43 | M | Cau              | Elavil           |
| Testi - Seminiferous Tubule | TestisSeminiferousTubule |           | 70 | M | Cau              | aspirin          |
| Testi - Seminiferous Tubule | TestisSeminiferousTubule |           | 56 | M | Cau              | aspirin          |
| Testi - Seminiferous Tubule | TestisSeminiferousTubule |           | 43 | M | Cau              | NA               |
| Tongue                      | TONGUE                   | Clinomics | 44 | F | Cau              | aspirin          |
| Tongue                      | TONGUE                   |           | 33 | F | Cau              | aspirin, Tylenol |
| Tongue                      | TONGUE                   |           | 59 | M | Cau              | aspirin          |
| Tonsil                      | Tonsil                   | Clinomics | 52 | M | Cau              | NA               |
| Tonsil                      | Tonsil                   |           | 54 | M | Cau              | NA               |
| Tonsil                      | Tonsil                   |           | 33 | F | Cau              | aspirin          |
| Tonsil                      | Tonsil                   |           | 44 | F | Cau              | aspirin          |
| trigeminal ganglion         | TrigeminalGanglion       | Clinomics | 61 | M | Cau              | aspirin, Tylenol |
| trigeminal ganglion         | TrigeminalGanglion       |           | 35 | F | Cau              | None             |
| Uterus Corpus               | UterusCorpus             | Clinomics | 21 | F | Cau              | NA               |
| Uterus Corpus               | UterusCorpus             |           | 50 | F | Cau              | NA               |
| Whole Blood                 | WHOLEBLOOD               | UCSD      | 56 | M |                  |                  |
| Whole Blood                 | WHOLEBLOOD               |           | 73 | M |                  |                  |
| Whole Blood                 | WHOLEBLOOD               |           | 48 | F |                  |                  |
| CD105+ Endothelial          | BM-CD105+Endothelial     | AllCells  | 21 | M | Asian            |                  |
| CD105+ Endothelial          | BM-CD105+Endothelial     |           | 19 | F | Caucasian        |                  |
| CD33+ Myeloid               | BM-CD33+Myeloid          | AllCells  | 19 | F | Caucasian        |                  |
| CD33+ Myeloid               | BM-CD33+Myeloid          |           | 21 | M | Asian            |                  |
| CD34+                       | BM-CD34+                 | AllCells  | 33 | M | Caucasian        |                  |
| CD34+                       | BM-CD34+                 |           | 19 | M | Asian            |                  |
| CD71+ Early Erythroid       | BM-CD71+EarlyErythroid   | AllCells  | 29 | F | Caucasian        |                  |
| CD71+ Early Erythroid       | BM-CD71+EarlyErythroid   |           | 25 | M | Caucasian        |                  |
| BDCA4+ Dendritic Cells      | PB-BDCA4+Dendritic_Cells | AllCells  | 23 | F | Caucasian        |                  |
| BDCA4+ Dendritic Cells      | PB-BDCA4+Dendritic_Cells |           | 36 | M | Caucasian        |                  |
| CD14+ Monocytes             | PB-CD14+Monocytes        | AllCells  | 32 | M | Caucasian        |                  |
| CD14+ Monocytes             | PB-CD14+Monocytes        |           | 24 | M | Caucasian        |                  |
| CD19+ B Cells (neg. sel.)   | PB-CD19+Bcells           | AllCells  | 30 | F | Hispanic         |                  |
| CD19+ B Cells (neg. sel.)   | PB-CD19+Bcells           |           | 23 | M | African American |                  |
| CD4+ T cells                | PB-CD4+Tcells            | AllCells  | 24 | M | Caucasian        |                  |
| CD4+ T cells                | PB-CD4+Tcells            |           | 21 | M | Caucasian        |                  |
| CD56+ NK Cells              | PB-CD56+NKCells          | AllCells  | 29 | M | Caucasian        |                  |
| CD56+ NK Cells              | PB-CD56+NKCells          |           | 31 | F | Hispanic         |                  |
| CD8+ T cells                | PB-CD8+Tcells            | AllCells  | 29 | F | Caucasian        |                  |
| CD8+ T cells                | PB-CD8+Tcells            |           | 22 | M | Caucasian        |                  |

**Bought as RNA**

| Sample                              | Atlas sample label                  | Vendor   | Source    | Lot #   | Additional information                                                                              |
|-------------------------------------|-------------------------------------|----------|-----------|---------|-----------------------------------------------------------------------------------------------------|
| 721 B lymphoblasts                  | 721_B_lymphoblasts                  |          |           |         | Kavathas, P. et al., 1980. Proc Natl Acad Sci U S A 77:4251-4255.                                   |
| adrenal gland                       | adrenal gland                       | Clontech | total RNA | 1010548 | Normal, pooled from 62 male/female caucasians; ages 15-61                                           |
| amygdala                            | Amygdala                            | Clontech | poly A+   | 91122   | no info                                                                                             |
| bonemarrow                          | bonemarrow                          | Clontech | total RNA | 2011496 | normal bone marrow pooled from 8 male/female Caucasians, ages 22-65; cause of death: Sudden death   |
| caudate nucleus                     | caudate nucleus                     | Clontech | poly A+   | 120289  | no info                                                                                             |
| cerebellum                          | cerebellum                          | Clontech | total RNA | 1010033 | normal from 25 y/o Asian male; cause of death: sudden death                                         |
| colorectal adenocarcinoma           | Colorectal Adenocarcinoma           | Clontech | poly A+   | 1090559 | SW480 cell line; ATCC# CCL 228                                                                      |
| fetal brain                         | fetal brain                         | Clontech | total RNA | 2020902 | normal whole brains pooled from 59 spontaneously aborted male/female Caucasian fetuses, ages 20-33  |
| fetal liver                         | fetal liver                         | Clontech | total RNA | 110454  | normal whole livers pooled from spontaneously aborted fetuses, ages 15-24 weeks                     |
| fetal lung                          | fetal lung                          | Clontech | poly A+   | 1040999 | normal, whole lungs pooled from 38 spontaneously aborted male/female Caucasian fetuses, ages 22-27  |
| heart                               | Heart                               | Clontech | total RNA | 9020097 | normal, whole heart from a 25-yr-old male Asian; cause of death: Sudden Death                       |
| Hypothalamus                        | Hypothalamus                        | Clontech | poly A+   | 2040567 | normal hypothalamus pooled from 30 male/female Caucasians, ages 15-68; cause of death: sudden death |
| kidney                              | kidney                              | Clontech | total RNA | 110679  | normal, whole kidneys pooled from 6 female Caucasians, ages 28-52; cause of death: sudden death     |
| leukemia, chronic Myelogenous K-562 | leukemia chronic myelogenous (k562) | Clontech | poly A+   | 1060047 | K-562 cell line; ATCC #CCL-243                                                                      |
| leukemia, promyelocytic HL-60       | leukemia promyelocytic (hl60)       | Clontech | poly A+   | 6080170 | normal, whole from a Caucasian                                                                      |
| leukemia lymphoblastic (MOLT-4)     | leukemia lymphoblastic (molt4)      | Clontech | poly A+   | 1020175 | normal, whole from a 19-yr-old male Caucasian                                                       |
| liver                               | Liver                               | Clontech | total RNA | 2020453 | normal whole liver from a 27 y/o male Asian; cause of death: sudden death                           |
| lung                                | Lung                                | Clontech | total RNA | 1020471 | normal from 2 male/female Caucasian ages 30-40 y/o; cause of death: sudden death                    |

|                           |                       |           |           |         |                                                                                                              |
|---------------------------|-----------------------|-----------|-----------|---------|--------------------------------------------------------------------------------------------------------------|
| lymphnode                 | lymphnode             | Clontech  | poly A+   | 1090563 | normal lymph nodes pooled from 30 male/female Caucasians, ages 20-61; cause of death: Sudden Death           |
| lymphoma,burkitt's(Daudi) | lymphomaburkittsDaudi | Clontech  | poly A+   | 1060332 | Burkitt's Lymphoma, Daudi cell line; ATCC# CCL-213                                                           |
| Lymphoma,burkitt's(Raji)  | lymphomaburkittsRaji  | Clontech  | poly A+   | 1070752 | H. Burkitt's Lymphoma, Raji cell line; ATCC# CCL 86                                                          |
| pancreas                  | Pancreas              | Clinomics | total RNA | custom  |                                                                                                              |
| placenta                  | PLACENTA              | Clontech  | total RNA | 2041227 | normal, 4 caucasians, ages 21-39                                                                             |
| Prostate                  | Prostate              | Clontech  | total RNA | 100649  | normal, whole prostates pooled from 16 Caucasians, ages 21-50.; cause of death: trauma                       |
| spinalcord                | spinalcord            | Clontech  | poly A+   | 111062  | no info                                                                                                      |
| testis                    | testis                | Clontech  | total RNA | 120293  | no info                                                                                                      |
| thalamus                  | Thalamus              | Clontech  | poly A+   | 1070147 | normal tissue pooled from 10 male/female Caucasians, ages 32-75; cause of death: trauma                      |
| thymus                    | thymus                | Clontech  | total RNA | 111351  | no info                                                                                                      |
| thyroid                   | Thyroid               | Clontech  | total RNA | 2010806 | normal, whole thyroid glands pooled from 65 male/female Caucasians, ages 15-61; cause of death: Sudden Death |
| trachea                   | trachea               | Clontech  | total RNA | 1010201 | normal, whole trachea from a 17-70-yr-old male/female Caucasian; cause of death: Trauma                      |
| Uterus                    | Uterus                | Clontech  | total RNA | no info | no info                                                                                                      |
| wholebrain                | WholeBrain            | Clontech  | total RNA | 9020101 | normal, whole brain from a 28-yr-old male Asian; cause of death: sudden death                                |

\* Tissue samples often contain heterogenous cell populations (e.g., blood, vasculature, connective tissue).

† From Gino Van Heeke, Novartis cell line NHBE 6167.

‡ Novartis, Graeme Bilbe, Jose Crespo.
