# Supplementary material
Source: PubMed Central journal article supplement (PMC395923)

**A**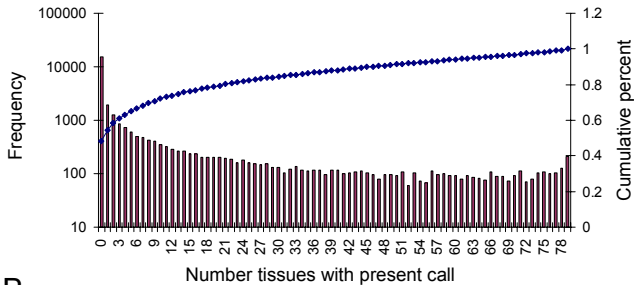**B**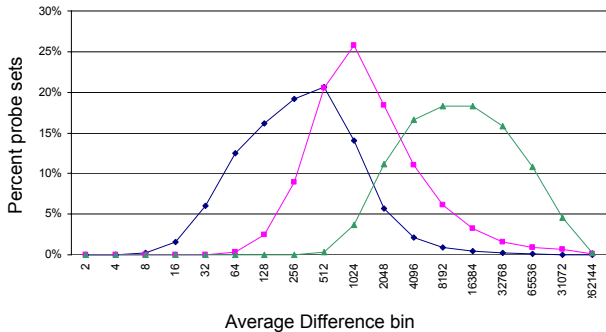

Supplement: pnas_101_16_6062__2.pdf [file pnas_101_16_6062__2.pdf]

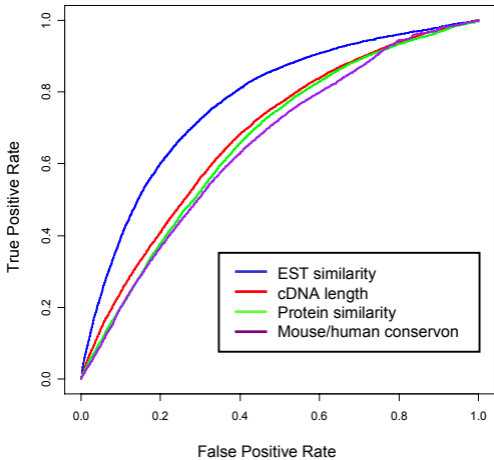

Supplement: pnas_101_16_6062__3.pdf [file pnas_101_16_6062__3.pdf]
